# Supplementary material
Source: publisher figshare collection journal article supplement (https://geolsoc.figshare.com/ndownloader/files/14702138)
Supplement: Supplementary file 1 [file 14702138]

## Sheet: AG01-01
AG01-01
Temp	Ar36	err	Ar37	err	Ar38	err	Ar39	err	Ar40	err	% Ar40*	Ar40*/	Cumulative	Calculated Age			Ca/K	Cl/K
(C)	(mol)	(%)	(mol)	(%)	(mol)	(%)	(mol)	(%)	(mol)	(%)		Ar39(K)	Ar39(%)	Ma	±	1 sd
450	1.686e-16	23.88	6.095e-19	71.35	3.156e-15	18.09	6.86e-16	4.53	2.479e-13	1.55	79.9	288.725	0.01	1508.65	±	20.57	0.00169	0.552
450	1.325e-16	5.06	3.595e-19	31.82	3.234e-16	23.46	4.103e-16	2.93	5.04e-14	2.94	22.3	27.359	0.02	210.74	±	14.66	0.00166	0.0739
500	1.598e-16	2.66	6.361e-17	72.59	3.492e-15	5.37	1.06e-15	0.5	2.58e-13	0.53	81.7	198.918	0.04	1158.84	±	7.31	0.114	0.391
500	1.654e-16	1.4	3.6e-19	24.59	8.484e-16	4.28	2.685e-15	0.88	7.138e-14	0.91	31.4	8.361	0.09	67.05	±	2.53	0.000255	0.021
550	9.142e-17	1.28	2.037e-16	69.68	6.464e-15	2.02	6.477e-15	0.51	3.71e-13	0.58	92.7	53.088	0.21	388.72	±	1.87	0.0597	0.107
550	9.366e-17	1.96	1.169e-16	13.57	2.713e-15	2.85	1.14e-14	0.24	7e-14	0.28	60	3.686	0.42	29.87	±	0.45	0.0195	0.0125
600	1.054e-16	1.98	1.458e-16	13.71	1.148e-14	1.48	2.203e-14	0.12	4.864e-13	0.21	93.5	20.642	0.84	161.24	±	0.92	0.0126	0.048
600	1.009e-16	1.9	4.677e-16	7.46	5.823e-15	1.12	3.528e-14	0.23	1.211e-13	0.31	74.6	2.563	1.5	20.82	±	0.13	0.0252	0.00356
650	1.068e-16	1.99	1.018e-16	9.21	1.469e-14	0.42	5.044e-14	0.17	4.73e-13	0.25	93	8.726	2.44	69.93	±	0.25	0.00383	0.0194
650	1.022e-16	2.01	6.872e-16	5.51	1.227e-14	0.62	7.833e-14	0.1	2.074e-13	0.29	84.5	2.236	3.9	18.18	±	0.08	0.0167	0.00255
700	1.121e-16	2.12	6.587e-19	9.94	1.843e-14	0.75	9.299e-14	0.19	4.296e-13	0.29	91.7	4.236	5.64	34.29	±	0.16	1.35e-05	0.00775
700	1.12e-16	1.55	1.69e-16	7.09	1.898e-14	1.65	1.253e-13	0.51	2.89e-13	0.72	87.4	2.015	7.98	16.39	±	0.09	0.00256	0.0019
750	8.733e-17	2	2.558e-16	8.19	2.322e-14	1.2	1.359e-13	0.16	4.312e-13	0.28	93.2	2.956	10.52	23.99	±	0.1	0.00358	0.00434
750	8.665e-17	1.61	2.6e-16	9.92	2.496e-14	0.79	1.672e-13	0.11	3.797e-13	0.17	92.1	2.091	13.65	17.01	±	0.07	0.00296	0.00166
800	6.336e-17	1.7	6.133e-16	2.46	2.257e-14	0.52	1.45e-13	0.13	3.544e-13	0.2	93.6	2.289	16.36	18.61	±	0.08	0.00804	0.00245
800	9.313e-17	1.39	3.103e-16	0.74	2.775e-14	0.24	1.876e-13	0.06	4.029e-13	0.15	91.9	1.975	19.86	16.06	±	0.07	0.00314	0.00148
850	6.722e-17	1.19	4.592e-16	0.78	2.359e-14	0.53	1.548e-13	0.16	3.573e-13	0.25	93.3	2.152	22.76	17.5	±	0.08	0.00563	0.00203
850	9.668e-17	1.69	6.377e-16	1.04	2.917e-14	0.28	1.963e-13	0.12	4.304e-13	0.18	92.1	2.02	26.43	16.43	±	0.07	0.00617	0.00156
900	6.352e-17	2.17	2.77e-16	1.02	2.205e-14	0.53	1.46e-13	0.08	3.36e-13	0.18	93.2	2.146	29.16	17.45	±	0.08	0.00361	0.00187
900	1.107e-16	2.46	9.265e-16	1.69	2.828e-14	0.45	1.895e-13	0.1	4.313e-13	0.19	91.3	2.076	32.7	16.89	±	0.07	0.00929	0.00164
950	7.762e-17	2.38	3.889e-16	1.43	2.257e-14	0.73	1.455e-13	0.42	3.574e-13	0.55	92.5	2.272	35.42	18.47	±	0.08	0.00508	0.00237
950	1.363e-16	1.27	5.49e-16	1.37	3.047e-14	0.78	2.011e-13	0.13	4.831e-13	0.22	90.5	2.175	39.18	17.69	±	0.07	8.97e-06	0.00192
950	2.402e-16	2	7.68e-16	1.61	3.792e-14	0.81	2.466e-13	0.34	6.306e-13	0.55	87.7	2.242	43.79	18.23	±	0.12	0.00592	0.00219
1000	9.766e-17	2.71	4.588e-16	1.96	1.963e-14	1.47	1.238e-13	0.57	3.432e-13	0.59	90.6	2.513	46.1	20.42	±	0.1	0.00704	0.0028
1000	1.55e-16	2.31	7.349e-16	2.77	2.797e-14	2.04	1.782e-13	0.83	4.92e-13	0.89	89.7	2.477	49.43	20.12	±	0.09	0.00783	0.00259
1050	1.195e-16	1.76	1.431e-15	1.65	2.743e-14	1.39	1.687e-13	1.34	5.075e-13	0.95	92.2	2.773	52.59	22.52	±	0.08	0.0161	0.00331
1050	2.357e-16	2.44	1.838e-16	1.58	3.693e-14	0.85	2.262e-13	1.43	7.234e-13	0.36	89.5	2.863	56.81	23.25	±	0.1	0.00154	0.00339
1050	4.9e-16	2.43	8.797e-16	1.28	4.94e-14	0.93	2.952e-13	0.52	1.057e-12	0.42	85.6	3.064	62.33	24.86	±	0.13	0.00566	0.00388
1100	1.437e-16	1.99	5.731e-16	1.88	2.631e-14	2.31	1.533e-13	0.99	5.453e-13	0.74	91.5	3.254	65.19	26.39	±	0.1	0.0071	0.00443
1100	3.356e-16	2.84	6.136e-16	2.04	3.67e-14	1.56	2.159e-13	0.33	8.082e-13	0.76	87	3.256	69.23	26.41	±	0.11	0.0054	0.0042
1100	5.778e-16	2.07	1.65e-18	2.16	4.73e-14	0.89	2.736e-13	0.78	1.121e-12	0.5	84.1	3.447	74.35	27.94	±	0.15	1.15e-05	0.00456
1100	7.023e-16	2.84	2.814e-18	1.62	3.487e-14	1.33	1.986e-13	0.35	9.395e-13	0.95	77.3	3.659	78.06	29.65	±	0.18	2.69e-05	0.00486
1100	9.555e-16	1.89	2.822e-18	1.63	2.993e-14	0.26	1.62e-13	1.05	9.66e-13	0.39	70.3	4.194	81.09	33.95	±	0.34	3.31e-05	0.00596
1100	1.402e-15	2.18	2.835e-18	2.4	2.713e-14	0.84	1.392e-13	1.19	1.086e-12	0.77	61.5	4.793	83.69	38.75	±	0.37	3.87e-05	0.00712
1100	2.008e-15	2.32	2.852e-18	2.47	1.728e-14	0.36	8.576e-14	0.71	1.036e-12	0.39	42.5	5.13	85.29	41.44	±	0.84	6.32e-05	0.00764
1100	3.966e-15	2.48	2.885e-18	1.71	1.918e-14	0.65	9.061e-14	0.72	1.659e-12	0.28	29.2	5.343	86.98	43.14	±	1.4	6.05e-05	0.00843
1200	1.1e-16	1.52	4.34e-16	1.51	9.036e-15	0.49	4.06e-14	1.13	2.661e-13	1.12	87.4	5.728	87.74	46.21	±	0.63	0.0203	0.0108
1230	1.395e-16	1.84	3.112e-16	1.74	1.442e-14	1.63	5.903e-14	0.86	4.55e-13	0.68	90.6	6.983	88.85	56.17	±	0.29	0.01	0.0135
1260	2.043e-16	2.27	1.698e-18	1.91	2.755e-14	1.33	1.05e-13	0.95	8.705e-13	0.29	92.7	7.692	90.81	61.78	±	0.3	3.07e-05	0.0158
1290	2.203e-16	3.12	2.892e-18	2.86	3.004e-14	1.66	1.155e-13	0.81	9.74e-13	0.83	93	7.841	92.97	62.96	±	0.29	4.76e-05	0.0155
1320	3.117e-16	3.05	9.938e-19	3.16	4.915e-14	2.02	1.827e-13	1.05	1.646e-12	0.67	94.1	8.481	96.38	68	±	0.21	1.03e-05	0.0166
1350	3.507e-16	2.72	1.702e-18	3.18	4.262e-14	1.43	1.562e-13	1.06	1.543e-12	0.65	93	9.187	99.3	73.55	±	0.31	2.07e-05	0.017
1450	1.703e-15	1.85	3.206e-15	1.8	1.024e-14	1.44	3.737e-14	0.81	8.334e-13	0.77	39.5	8.819	100	70.66	±	1.6	0.163	0.0162
AG01-02
Temp	Ar36	err	Ar37	err	Ar38	err	Ar39	err	Ar40	err	% Ar40*	Ar40*/	Cumulative	Calculated Age			Ca/K	Cl/K
(C)	(mol)	(%)	(mol)	(%)	(mol)	(%)	(mol)	(%)	(mol)	(%)		Ar39(K)	Ar39(%)	Ma	±	1 sd
450	1.766e-16	3.26	6.987e-19	22.41	6.602e-15	17.23	1.061e-15	4.43	6.005e-13	3.4	91.3	516.748	0.02	2176.72	±	8.07	0.00125	0.757
450	1.721e-16	3.92	8.331e-17	43.76	5.393e-16	6.44	1.159e-15	1.47	6.837e-14	0.55	25.6	15.095	0.05	119.39	±	8.71	0.137	0.0377
500	9.764e-17	2.34	1.016e-16	34.36	7.106e-15	5.53	1.72e-15	0.34	5.788e-13	0.77	95	319.667	0.09	1615.7	±	4.97	0.112	0.498
500	1.217e-16	2.71	5.527e-17	42.33	1.005e-15	8.33	3.327e-15	0.63	7.171e-14	0.54	49.7	10.722	0.17	85.6	±	3.2	0.0316	0.0199
550	1.28e-17	2.4	1.636e-16	42.51	5.547e-16	3.46	2.078e-15	0.36	2.084e-14	0.29	81.7	8.192	0.21	65.76	±	2.31	0.15	0.0162
550	3.724e-17	2.85	1.122e-16	46.75	1.05e-15	1.51	4.654e-15	0.44	3.68e-14	0.37	69.8	5.518	0.32	44.56	±	0.73	0.0458	0.011
600	2.501e-17	2.03	7.406e-19	79.31	1.936e-15	0.78	1.014e-14	0.17	4.559e-14	0.31	83.2	3.74	0.55	30.32	±	0.42	0.000139	0.0068
600	5.239e-17	1.2	1.095e-16	61.48	3.665e-15	1.1	2.123e-14	0.14	7.886e-14	0.15	79.7	2.958	1.04	24.03	±	0.2	0.0098	0.00452
650	4.531e-17	0.78	7.418e-19	57.1	5.92e-15	1.07	3.65e-14	0.09	1.049e-13	0.17	86.3	2.48	1.87	20.16	±	0.15	3.86e-05	0.00324
650	8.145e-17	3.47	3.982e-16	74.21	9.588e-15	1.21	6.134e-14	0.11	1.624e-13	0.17	84.2	2.229	3.27	18.13	±	0.08	0.0123	0.00251
700	5.536e-17	1.32	5.54e-16	31.99	1.184e-14	0.38	7.757e-14	0.13	1.848e-13	0.17	90	2.145	5.05	17.45	±	0.1	0.0136	0.00206
700	1.056e-16	1.66	7.436e-19	20.79	1.645e-14	0.65	1.089e-13	0.3	2.514e-13	0.12	86.4	1.994	7.54	16.23	±	0.11	1.3e-05	0.00185
750	5.806e-17	1.34	3.714e-16	26.06	1.587e-14	0.86	1.055e-13	0.24	2.357e-13	0.15	91.5	2.046	9.95	16.65	±	0.09	0.00669	0.0018
750	7.539e-17	1.33	2.564e-16	93.01	1.995e-14	0.57	1.337e-13	0.17	2.927e-13	0.18	91.2	1.996	13	16.24	±	0.09	0.00364	0.00164
800	5.461e-17	1.63	1.491e-16	72.76	1.675e-14	0.58	1.116e-13	0.12	2.455e-13	0.39	92.2	2.029	15.55	16.51	±	0.1	0.00254	0.00175
800	7.437e-17	4.91	2.579e-16	26.6	1.973e-14	0.32	1.321e-13	0.12	2.929e-13	0.22	91.3	2.023	18.57	16.47	±	0.07	0.00371	0.00165
850	5.331e-17	3.99	4.024e-16	28.25	1.546e-14	1.51	1.006e-13	0.31	2.321e-13	0.24	92.1	2.124	20.87	17.28	±	0.08	0.0076	0.0022
850	8.238e-17	2	2.334e-16	46.22	1.872e-14	0.59	1.239e-13	0.12	2.863e-13	0.25	90.3	2.087	23.7	16.98	±	0.08	0.00358	0.00187
900	6.75e-17	4.14	7.477e-19	77.1	1.479e-14	0.44	9.247e-14	0.21	2.38e-13	0.24	90.6	2.331	25.81	18.96	±	0.11	1.54e-05	0.00297
900	1.057e-16	2.28	5.431e-16	21.14	1.922e-14	1.73	1.247e-13	0.14	3.144e-13	0.22	89	2.245	28.66	18.26	±	0.1	0.00828	0.00225
950	1.096e-16	3.35	9.049e-17	46.61	1.686e-14	0.85	1.001e-13	0.21	3.056e-13	0.39	88.5	2.701	30.95	21.95	±	0.11	0.00172	0.00401
950	1.214e-16	3.36	3.065e-16	58.19	2.298e-14	1.68	1.399e-13	1.17	4.158e-13	0.23	90.5	2.689	34.15	21.85	±	0.08	0.00416	0.00351
950	2.212e-16	1.44	1.077e-18	31.44	2.852e-14	3.41	1.659e-13	1.03	5.825e-13	0.4	88	3.089	37.94	25.08	±	0.1	1.23e-05	0.00445
1000	1.179e-16	3.67	6.275e-16	53.87	1.732e-14	8.42	8.529e-14	0.59	4.012e-13	0.66	90.8	4.269	39.89	34.57	±	0.15	0.014	0.00836
1000	1.714e-16	3.46	7.556e-19	13.31	2.415e-14	5.65	1.283e-13	0.57	5.569e-13	0.56	90.3	3.919	42.82	31.76	±	0.13	1.12e-05	0.00649
1050	1.606e-16	1.46	1.762e-16	23.64	2.907e-14	2.6	1.432e-13	0.74	7.056e-13	0.46	92.7	4.57	46.1	36.98	±	0.17	0.00234	0.00835
1050	2.348e-16	2.84	5.718e-16	45.14	4.382e-14	6.55	2.291e-13	0.54	1.042e-12	0.18	92.7	4.217	51.33	34.15	±	0.11	0.00474	0.00689
1050	4.127e-16	1.03	5.492e-16	52.18	6.116e-14	0.32	3.241e-13	0.57	1.484e-12	0.15	91.2	4.177	58.74	33.83	±	0.17	0.00322	0.00656
1100	1.349e-16	3.83	8.135e-16	19.84	3.266e-14	0.55	1.711e-13	0.5	7.931e-13	0.13	94.4	4.376	62.65	35.43	±	0.12	0.00903	0.00684
1100	2.398e-16	1.57	6.006e-16	28.42	4.34e-14	0.62	2.373e-13	0.5	1.031e-12	0.13	92.5	4.021	68.07	32.58	±	0.13	0.00481	0.00584
1100	4.24e-16	0.97	9.326e-16	25.62	5.005e-14	0.61	2.758e-13	0.54	1.27e-12	0.15	89.6	4.123	74.37	33.4	±	0.14	0.00642	0.00565
1100	5.037e-16	3.39	5.807e-16	21.38	3.163e-14	0.46	1.722e-13	0.5	9.017e-13	0.37	83	4.345	78.31	35.18	±	0.25	0.00641	0.00589
1100	6.913e-16	1.71	1.029e-15	30.96	2.49e-14	0.42	1.303e-13	0.51	8.342e-13	0.25	75.1	4.808	81.29	38.89	±	0.34	0.015	0.00676
1100	1.109e-15	2.37	2.974e-15	36.2	2.406e-14	0.51	1.188e-13	0.68	9.775e-13	0.19	66.2	5.448	84	44	±	0.38	0.0476	0.0081
1100	1.551e-15	2.43	4.911e-16	23.76	2.067e-14	0.33	9.601e-14	0.72	1.039e-12	0.14	55.6	6.016	86.19	48.53	±	0.9	0.00972	0.00953
1100	3.246e-15	2.43	4.939e-16	49.64	2.243e-14	1.16	9.966e-14	0.87	1.63e-12	0.13	41	6.71	88.47	54.04	±	0.91	0.00942	0.0104
1200	7.937e-17	2.47	7.815e-19	37.74	5.828e-15	1.85	2.391e-14	1.32	2.127e-13	0.42	88.7	7.89	89.02	63.38	±	0.32	6.21e-05	0.0134
1230	1.167e-16	5.87	2.167e-16	66.59	1.235e-14	2.16	4.98e-14	1.17	4.328e-13	0.21	91.7	7.971	90.16	64.02	±	0.27	0.00827	0.0139
1260	1.693e-16	3.1	1.117e-18	19.55	2.213e-14	2.54	8.425e-14	2.09	8.003e-13	0.24	93.5	8.878	92.08	71.17	±	0.23	2.52e-05	0.0158
1290	2.655e-16	2.86	1.913e-18	38.5	3.913e-14	3.38	1.409e-13	1.84	1.475e-12	0.19	94.4	9.889	95.3	79.09	±	0.32	2.58e-05	0.0177
1320	2.883e-16	3.49	3.869e-16	24.71	4.039e-14	3.63	1.468e-13	1.32	1.607e-12	0.3	94.5	10.34	98.66	82.62	±	0.3	0.00501	0.0173
1350	2.133e-16	4.99	1.916e-18	18.65	1.45e-14	3	5.316e-14	1.17	6.071e-13	1.26	89.4	10.209	99.87	81.6	±	0.44	6.85e-05	0.017
1450	2.004e-15	2.09	1.529e-15	99.8	1.889e-15	7.48	5.609e-15	2.09	6.587e-13	1.09	10.1	11.843	100	94.32	±	13.62	0.518	0.0167
